# Supplementary material for: A Home-Treatment Algorithm Based on Anti-inflammatory Drugs to Prevent Hospitalization of Patients With Early COVID-19: A Matched-Cohort Study (COVER 2)
Source: PubMed Central journal article supplement (PMC9073076; doi:10.3389/fmed.2022.785785), 2022-04-22
Supplement: Data_Sheet_1.pdf [file Data_Sheet_1.pdf]

**SUPPLEMENTARY MATERIAL - COVER 2 study**

**Supplementary Table S1.** Covariate balance across overall ‘control’ and ‘recommended treatment’ cohorts before and after matching.

|                                    | <b>Control cohort</b><br>( <i>n</i> =3260) | <b>Recommended treatment cohort</b><br>( <i>n</i> =108) | <b>Standardised Difference before matching*</b><br>(%) | <b>Standardised Difference after matching*</b><br>(%) |
|------------------------------------|--------------------------------------------|---------------------------------------------------------|--------------------------------------------------------|-------------------------------------------------------|
| <b>Demographic characteristics</b> |                                            |                                                         |                                                        |                                                       |
| Mean age ± SD ( <i>years</i> )     | 51.58±14.72                                | 53.1±15.8                                               | 10.2                                                   | 2.6                                                   |
| Males, <i>n</i> (%)                | 1228 (37.67)                               | 46 (42.59)                                              | 10.1                                                   | 17.2                                                  |
| <b>Comorbidities, <i>n</i> (%)</b> |                                            |                                                         |                                                        |                                                       |
| Cardiovascular disease             | 159 (4.88)                                 | 8 (7.41)                                                | 10.6                                                   | 3.4                                                   |
| Hypertension                       | 591 (18.13)                                | 23 (21.30)                                              | 8.0                                                    | 4.5                                                   |
| Diabetes mellitus                  | 116 (3.56)                                 | 1 (0.93)                                                | 17.9                                                   | 18.6                                                  |
| Overweight/Obesity                 | 481 (14.75)                                | 11 (10.18)                                              | 13.9                                                   | 30.9                                                  |

Data are numbers (percentages).

\* Standardised differences between the two groups calculated using ‘stddiff’ STATA module.

**Supplementary Table S2.** Demographic and early symptoms associated with COVID-19 illness in the overall ORIGIN control group.

|                                     | <b>Overall</b><br>( <i>n</i> =3260) |
|-------------------------------------|-------------------------------------|
| <b>Demographic characteristics</b>  |                                     |
| <i>Age, years</i>                   |                                     |
| 18-40                               | 726 (22.27)                         |
| 41-65                               | 1991 (61.07)                        |
| 66-75                               | 406 (12.45)                         |
| >75                                 | 137 (4.20)                          |
| Mean age ± SD                       | 51.58±14.72                         |
| Males, <i>n</i> (%)                 | 1228 (37.67)                        |
| <b>Comorbidities, <i>n</i> (%)</b>  |                                     |
| Cardiovascular disease              | 159 (4.88)                          |
| Hypertension                        | 591 (18.13)                         |
| Diabetes mellitus                   | 116 (3.56)                          |
| Overweight/Obesity                  | 481 (14.75)                         |
| <b>Early symptoms, <i>n</i> (%)</b> |                                     |
| Fever                               | 1932 (59.26)                        |
| Myalgia                             | 1501 (46.04)                        |
| Tiredness/exhaustion                | 1890 (57.98)                        |
| Dyspnoea                            | 688 (21.10)                         |
| Chest pain                          | 476 (14.60)                         |
| Headache                            | 1141 (35.00)                        |
| Lack of appetite                    | 835 (25.61)                         |
| Cough                               | 1195 (36.66)                        |
| Sore throat                         | 524 (16.07)                         |
| Rhinitis                            | 405 (12.42)                         |
| Vomiting/nausea                     | 454 (13.93)                         |
| Diarrhoea                           | 672 (20.61)                         |
| Red eyes                            | 397 (12.18)                         |
| Anosmia                             | 716 (21.96)                         |
| Ageusia                             | 1503 (46.10)                        |

Data are numbers (percentages).

**Supplementary Table S3.** Multivariable logistic regression based on all 3368 patients (3260 included in the ‘control’ and 108 in the ‘recommended treatment’ cohort).

|                                    | <b>Odds ratio</b> | <b>95% confidence interval</b> | <b>P value</b> |
|------------------------------------|-------------------|--------------------------------|----------------|
| Age ( <i>years</i> )               | 0.95              | 0.94 to 0.97                   | <0.0001        |
| Male sex                           | 0.26              | 0.19 to 0.35                   | <0.0001        |
| Cardiovascular disease             | 1.60              | 1.01 to 2.47                   | 0.0408         |
| Hypertension                       | 1.23              | 0.88 to 1.69                   | 0.2200         |
| Diabetes mellitus                  | 1.51              | 0.90 to 2.48                   | 0.1083         |
| Overweight/Obesity                 | 2.05              | 1.45 to 2.88                   | <0.0001        |
| Treatment (control vs recommended) | 8.90              | 1.92 to 158.37                 | 0.0313         |

## COVER 2 Study Organisation

Members of the COVER 2 Study Organisation includes the following (all in Italy): *Chief Investigator* - Giuseppe Remuzzi (Bergamo); *Study coordinators* - Norberto Perico, Fredy Suter (Bergamo); *Coordinating Centre* – Istituto di Ricerche Farmacologiche Mario Negri IRCCS, Centro di Ricerche Cliniche per le Malattie Rare *Aldo e Cele Daccò*, Ranica (Bergamo); *Study investigators including patients* - Elena Consolaro (Varese), Chiara Moroni (Varese), Umberto Cantarelli (Teramo), Stefania Pedroni (Varese), Maria Vittoria Paganini (Varese), Elena Pastò (Varese), Grazia Pravettoni (Varese), Fredy Suter (Bergamo); *Data collection and processing* – Nadia Rubis, Davide Villa, Olimpia Diadei, Davide Martinetti, Matias Trillini (Bergamo); *Data Analysis* - Annalisa Perna, Tobia Peracchi (Bergamo); *Regulatory Affairs* - Paola Boccardo (Bergamo); *Finalisation of the manuscript*: Norberto Perico, Piero Ruggenenti, Giuseppe Remuzzi (Bergamo).
